# Supplementary material for: Insight into the K channel's selectivity from binding of K+, Na+ and water to N-methylacetamide
Source: Royal Society of Chemistry journal article supplement (doi:10.1039/d3fd00110e), 2023-07-21
Supplement: d3fd00110e1.pdf [file d3fd00110e1.pdf]

**Supplementary Information:**  
**Insight into binding in the K-channels from**  
**binding of  $K^+$   $Na^+$  and water to**  
**N-methylacetamide**

Mark J. Stevens\* and Susan L. B. Rempe\*

*Center for Integrated Nanotechnologies, Sandia National Laboratories, Albuquerque, NM,  
87185*

E-mail: [msteve@sandia.gov](mailto:msteve@sandia.gov); [slrempe@sandia.gov](mailto:slrempe@sandia.gov)

## Data Tables

Distances between atom pairs in the  $K^+$  channel crystal structure 1K4C are given in Table S1. The enthalpies and entropies for the optimized structures for 1-8 8 NMA ligands are given in Table S2. For  $2K^+$  and 8 NMA, the data are given in Table S3.

Table S1: Distances in Å between atom pairs in 1K4C  $K^+$  channel. For the K atom, the index and site number (in parentheses) are given, OG is the hydroxyl oxygen of threonine, distances between amino acid oxygens describe separation among vertical layers.

| atom 1  | atom 2   | $r$  |
|---------|----------|------|
| K30 (1) | THR78:O  | 2.78 |
| K30 (1) | GLY77:O  | 3.07 |
| K31 (2) | GLY77:O  | 2.72 |
| K31 (2) | VAL76:O  | 2.83 |
| K32 (3) | VAL76:O  | 2.86 |
| K32 (3) | THR75:O  | 2.71 |
| K33 (4) | THR75:O  | 2.95 |
| K33 (4) | THR75:OG | 2.88 |
| THR75:O | THR75:OG | 3.05 |
| THR75:O | VAL76:O  | 3.35 |
| GLY77:O | VAL76:O  | 3.28 |
| GLY77:O | THR78:O  | 3.44 |

Table S2: Change in enthalpy  $\Delta H$  and entropy contribution  $-T\Delta S$  for the reaction of Eq. 1 with  $X = K^+$  and  $Na^+$  as a function of ligand number  $n$  in kcal/mol. The temperature  $T$  is 298K.

| $n$ | $\Delta H(K^+)$ | $-T\Delta S(K^+)$ | $\Delta H(Na^+)$ | $-T\Delta S(Na^+)$ |
|-----|-----------------|-------------------|------------------|--------------------|
| 1   | -31.0           | 7.1               | -39.1            | 6.1                |
| 2   | -56.3           | 15.0              | -70.6            | 14.2               |
| 3   | -74.3           | 21.5              | -92.0            | 23.9               |
| 4   | -102.9          | 39.8              | -112.7           | 40.2               |
| 5   | -119.8          | 52.0              | -140.7           | 52.4               |
| 6   | -138.6          | 68.5              | -158.9           | 68.4               |
| 8   | -175.5          | 91.9              | -189.0           | 90.8               |

Table S3: For 2 cations with 8 NMA the change in enthalpy  $\Delta H$ , entropy contribution  $-T\Delta S$  and change in free energy  $\Delta G$  for the reaction of Eq. 1 with  $X = \text{K}^+$  and  $\text{Na}^+$  in kcal/mol. For the single point calculation of  $\Delta G$  for the  $\text{Na}^+$  system, the entropy of the optimized system was used. The temperature  $T$  is 298K.

| cation        | $\Delta H$ | $-T\Delta S$ | $\Delta G$ | calculation type   |
|---------------|------------|--------------|------------|--------------------|
| $\text{K}^+$  | -195.9     | 104.2        | -91.6      | geometry optimized |
| $\text{Na}^+$ | -234.9     | 101.5        | -133.4     | geometry optimized |
| $\text{Na}^+$ | -189.6     | 101.5        | -88.1      | single point       |

## Images

Images for all the optimized structures for  $\text{K}^+$  and  $\text{Na}^+$  are shown in Figures S1 and S2. Figure S3 shows images of the individual layers of the selectivity filter.<sup>1</sup> The positions are available as separate data files. These files are named  $\text{K}n\_NMAm.xyz$  and  $\text{Na}n\_NMAm.xyz$ , where  $n$  gives the number of K or Na atoms in systems and  $m$  gives the NMA molecules. In addition, there is the file  $\text{Na}2\_NMA8\_SP.xyz$  that has the positions for the single point (SP) calculations of  $2\text{Na}^+$  and 8 NMA.

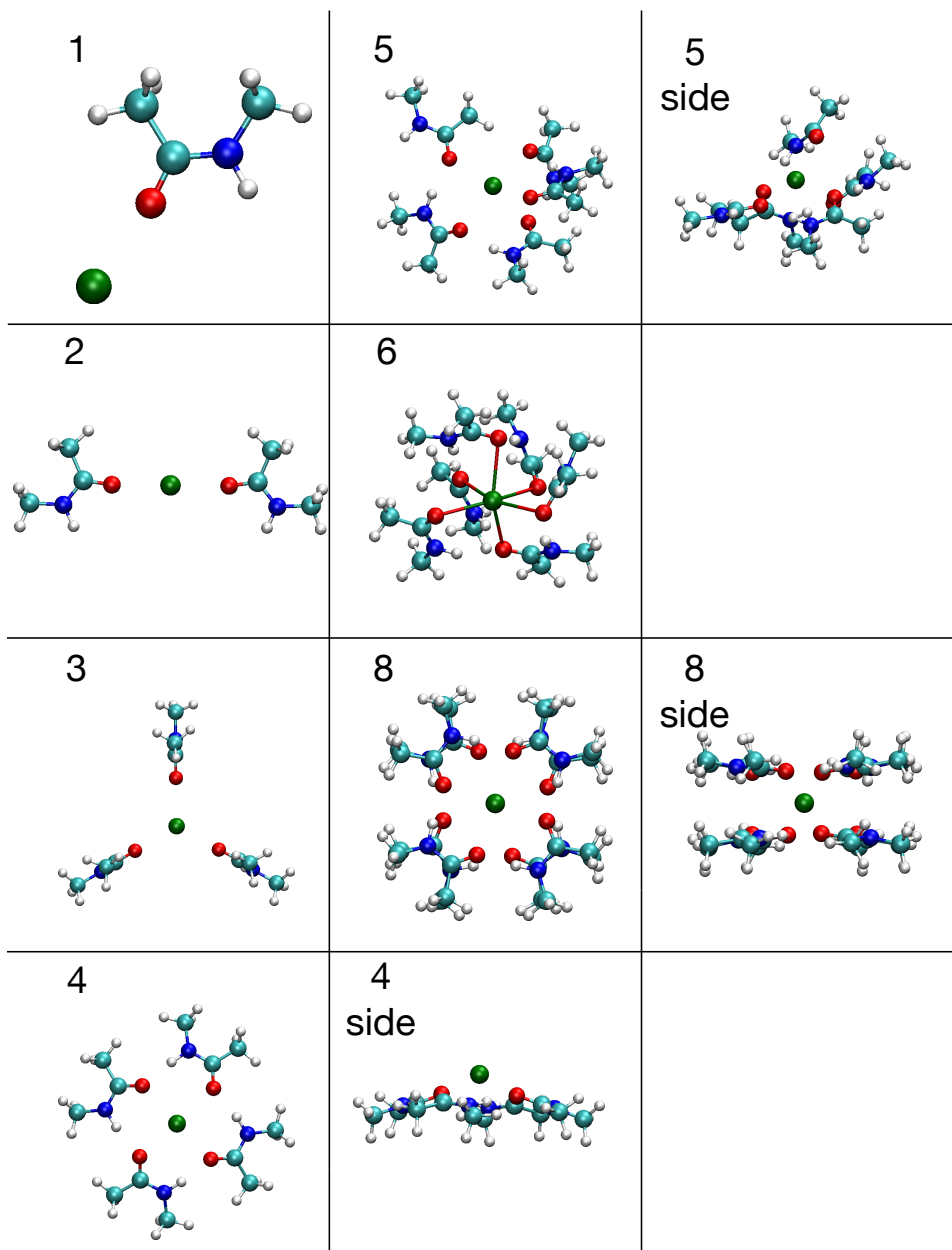

Figure S1: Images of  $K^+$  complexes binding to  $n$  NMA ligands. The atom colors are: O red, C cyan, N blue, H white, and K green.

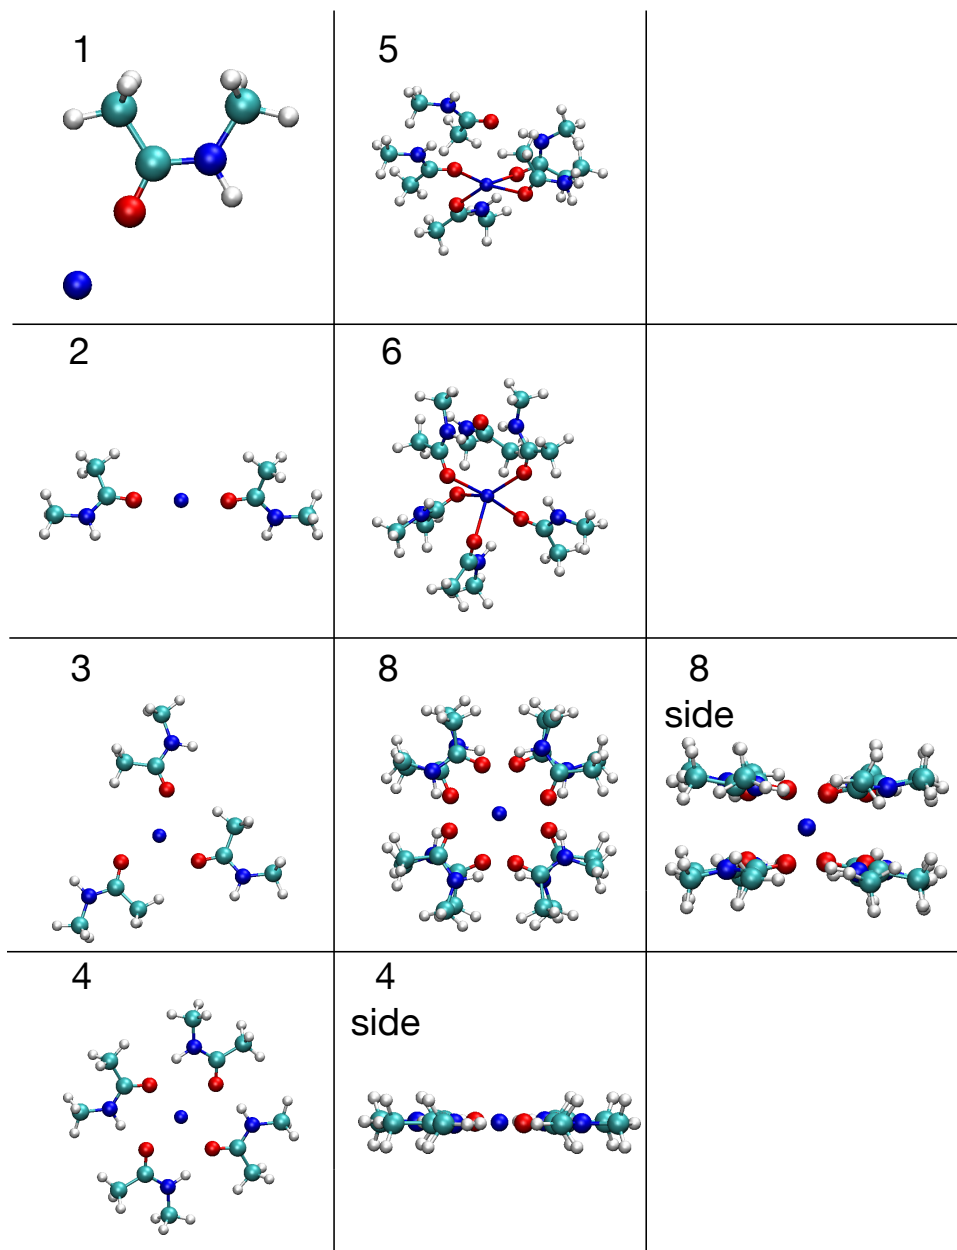

Figure S2: Images of  $\text{Na}^+$  complexes binding to  $n$  NMA ligands. The atom colors are: O red, C cyan, N blue, H white, and Na blue.

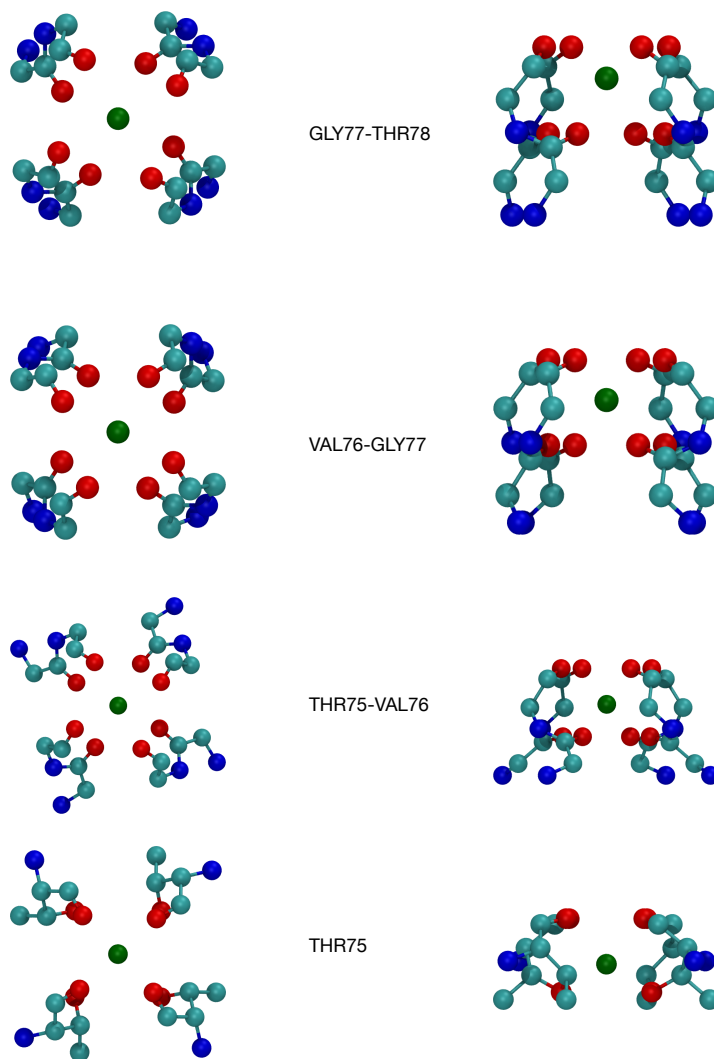

Figure S3: Images of the residue backbones for each of the 4 layers (binding sites S1 - S4 from top to bottom) of the selectivity filter of the 1K4C K-channel (left, top view; right, side view). Note that the oxygens of binding site S4 (bottom, THR75) are arranged differently from the others due to hydroxyl oxygens on the bottom layer.

## References

- (1) Zhou, Y.; Morais-Cabral, J.; Kaufman, A.; MacKinnon, R. Chemistry of Ion Coordination and Hydration Revealed by a K<sup>+</sup> Channel-Fab Complex at 2.0 Å Resolution. *Nature* **2001**, *414*, 43–48.
